# Supplementary material for: Characteristics of Bacteriophage Isolates and Expression of Shiga Toxin Genes Transferred to Non Shiga Toxin-Producing E. coli by Transduction
Source: PubMed Central journal article supplement (PMC9705938; doi:10.4014/jmb.2102.02040), 2021-03-26
Supplement: jmb-31-5-710-supple.pdf [file jmb-31-5-710-supple.pdf]

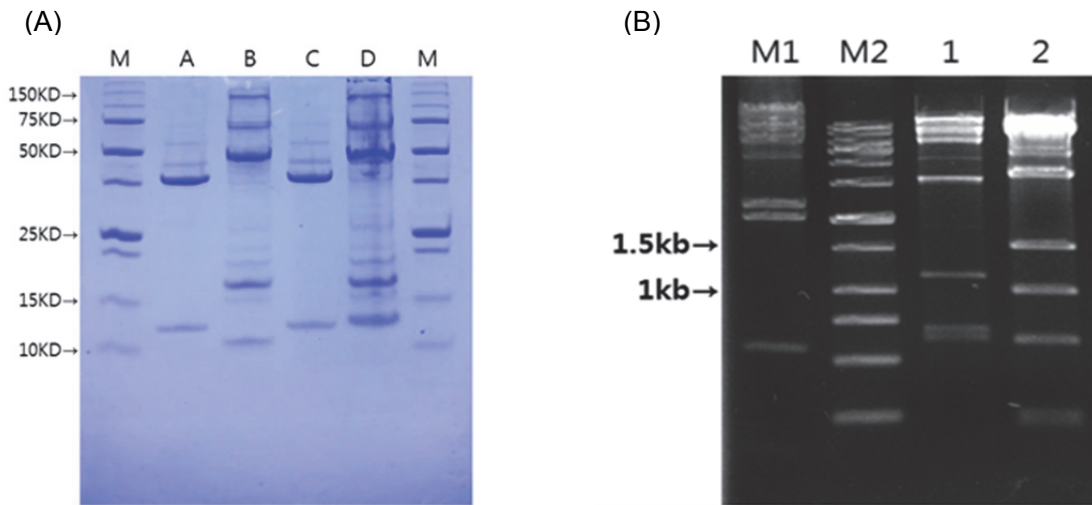

Supplementary Fig. 1. Analysis of Stx-encoding phage difference by SDS-PAGE (A) and restriction enzyme of *Sal* I (B). Symbols: (A) M, protein marker; A,  $\phi$ NOEC41; B,  $\phi$ NOEC46; C,  $\phi$ NOEC47; D,  $\phi$ NOEC49, (B) M1, Lambda DNA ladder; M2, 1kb DNA ladder; 1,  $\phi$ NOEC41; 2,  $\phi$ NOEC47

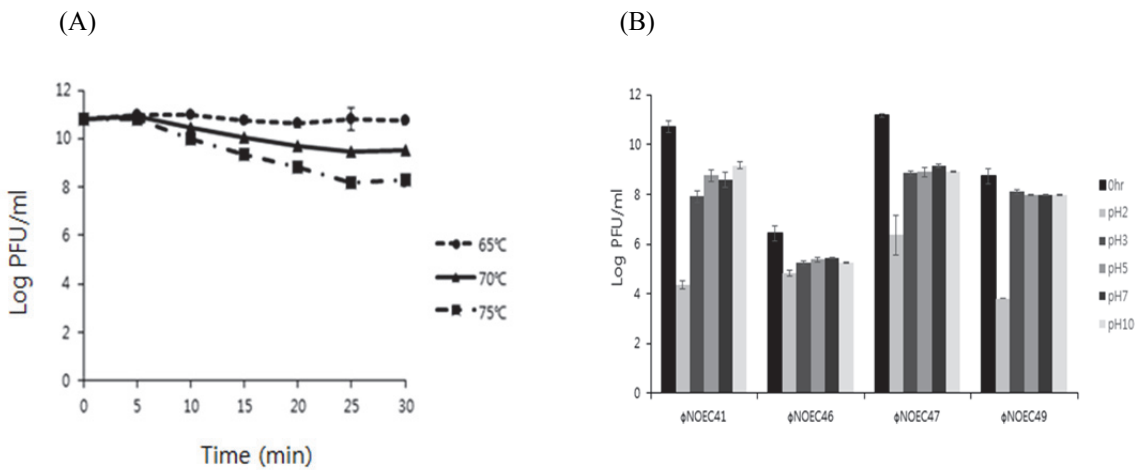

Supplementary Fig. 2. Stabilities of the phages under the various temperature and pH for  $\phi$ NOEC47 (A) and Stx-encoding phages (B) in 1 h.

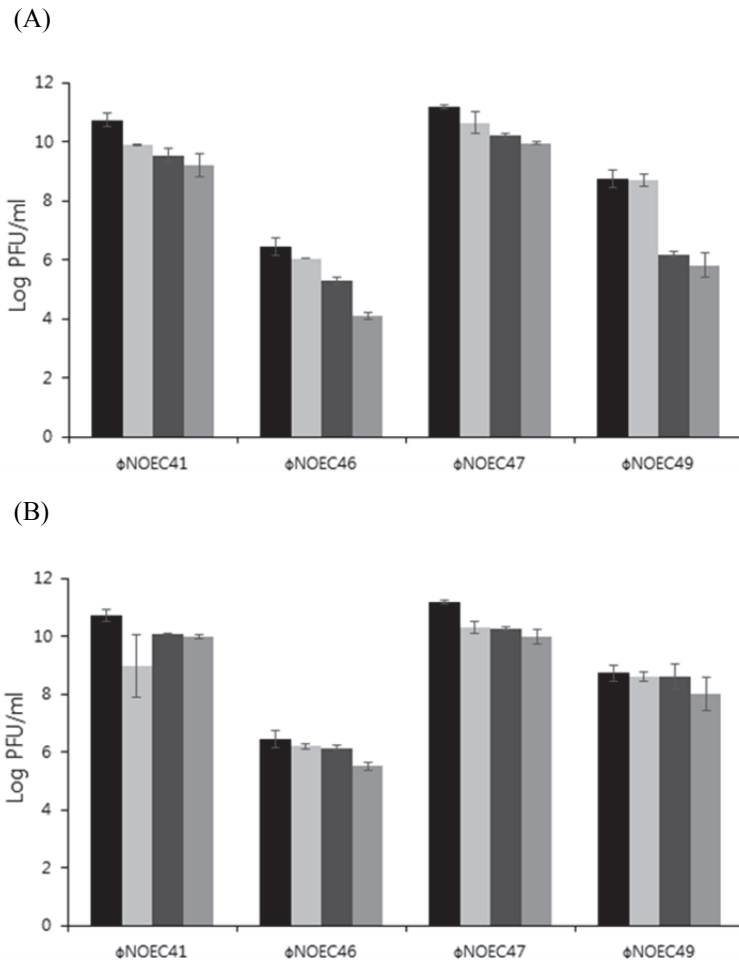

Supplementary Fig. 3. Stabilities of Stx-encoding phages under various concentrations of EtOH (A) and NaClO (B) for 30 min at room temperature. Symbols: black rectangular (0 h); light grey rectangular (A-30%, B-100 ppm); dim grey rectangular (A-50%, B-200 ppm); grey rectangular (A-70%, B-500 ppm) in sequence.

1

2
